# Supplementary material for: MC2 (M = Y, Zr, Nb, and Mo) monolayers containing C2 dimers: prediction of anode materials for high-performance sodium ion batteries
Source: Royal Society of Chemistry journal article supplement (doi:10.1039/d1na00422k), 2021-01-01
Supplement: d1na00422k1.pdf [file d1na00422k1.pdf]

## Supplementary Information

### **MC<sub>2</sub> (M = Y, Zr, Nb, and Mo) Monolayers Containing C<sub>2</sub> Dimers: Prediction of Anode Materials for High-performance Sodium Ion Batteries**

Zhanzhe Xu<sup>1</sup>, Xiaodong Lv<sup>2,3,4\*</sup>, Wenyue Gu<sup>1</sup>, Fengyu Li<sup>1,\*</sup>

<sup>1</sup> *School of Physical Science and Technology, Inner Mongolia University, Hohhot, 010021, China*

<sup>2</sup> *CAS Key Laboratory of Magnetic Materials and Devices, Ningbo Institute of Materials Technology and Engineering, Chinese Academy of Sciences, Ningbo 315201, China.*

<sup>3</sup> *Zhejiang Province Key Laboratory of Magnetic Materials and Application Technology, Ningbo Institute of Materials Technology and Engineering, Chinese Academy of Sciences, Ningbo 315201, China.*

<sup>4</sup> *Ganjiang Innovation Academy, Chinese Academy of Sciences, Ganzhou 341000, People's Republic of China.*

\*Corresponding authors: lvxiaodong@nimte.ac.cn (XL); [fengyuli@imu.edu.cn](mailto:fengyuli@imu.edu.cn) (FL)

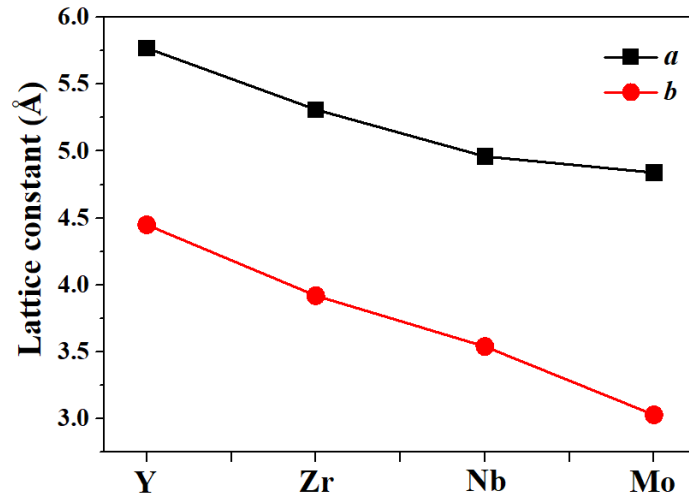

**Fig. S1** Lattice constants ( $a$ ,  $b$ ) of the  $MC_2$  ( $M$  = Y, Zr, Nb and Mo) monolayers.

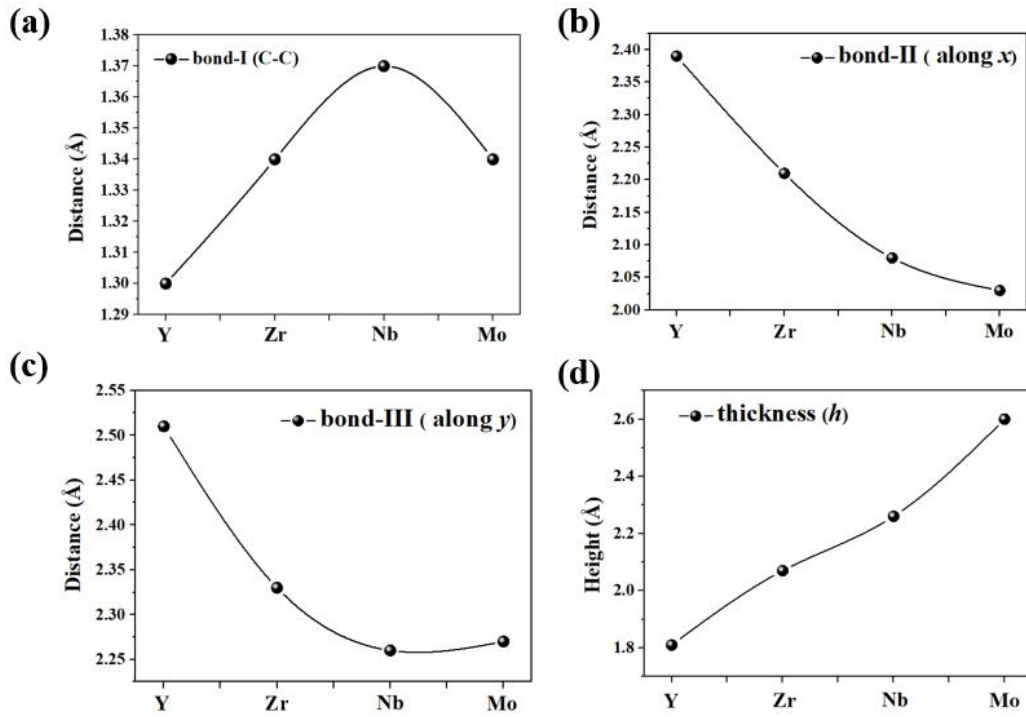

**Fig. S2** Bonds length of C-C (a), M-C in the (b) (c) and thickness (d) for the  $MC_2$  ( $M$  = Y, Zr, Nb and Mo) monolayers.

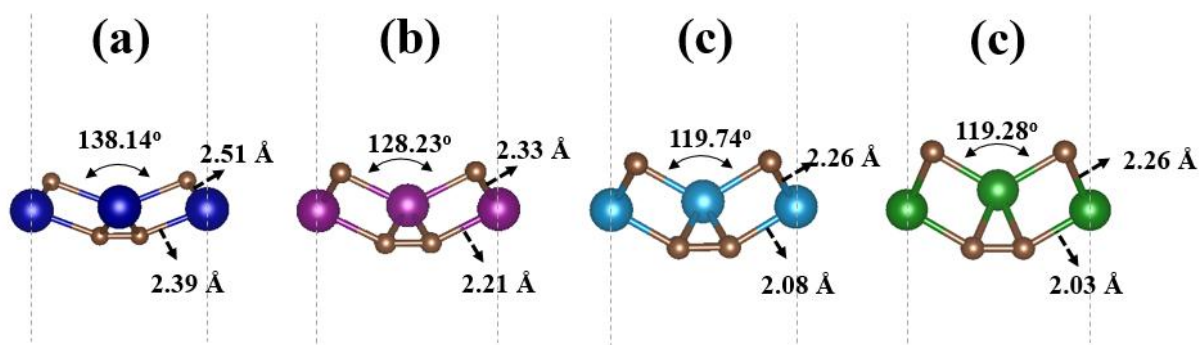

**Fig. S3** Bonds length of M-C along the  $x$  ( $y$ )-direction and bond angel ( $\angle_{C-M-C}$ ) for the MC<sub>2</sub> (a) YC<sub>2</sub>; (b) ZrC<sub>2</sub>; (c) NbC<sub>2</sub> and (d) MoC<sub>2</sub> monolayers.

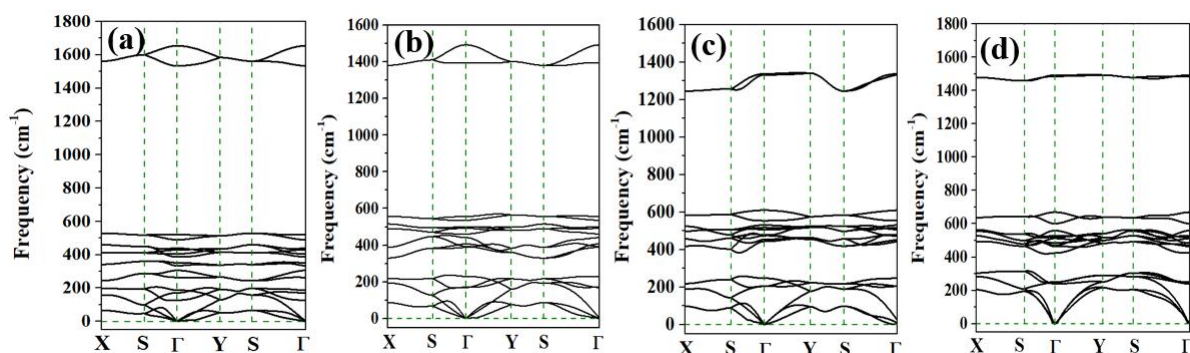

**Fig. S4** The calculated phonon spectra of the YC<sub>2</sub> (a), ZrC<sub>2</sub> (b), NbC<sub>2</sub> (c), and MoC<sub>2</sub> (d) monolayers.

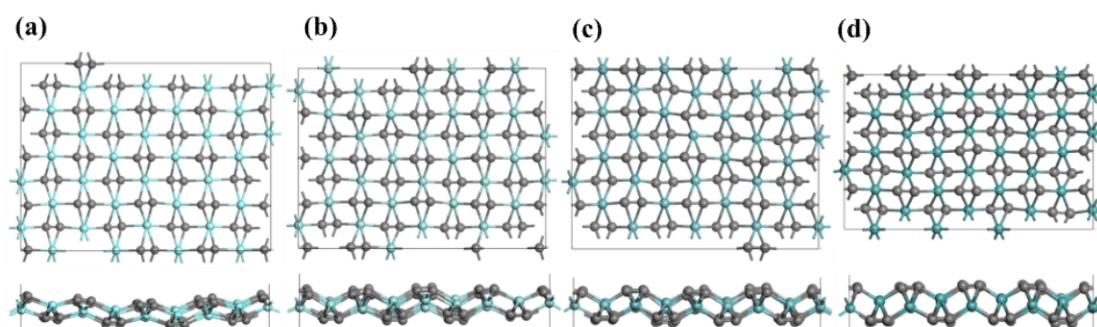

**Fig. S5** The snapshots of the YC<sub>2</sub> (a), ZrC<sub>2</sub> (b), NbC<sub>2</sub> (c) and MoC<sub>2</sub> (d) monolayers at the end of 5 ps FPMD simulations at 300 K.

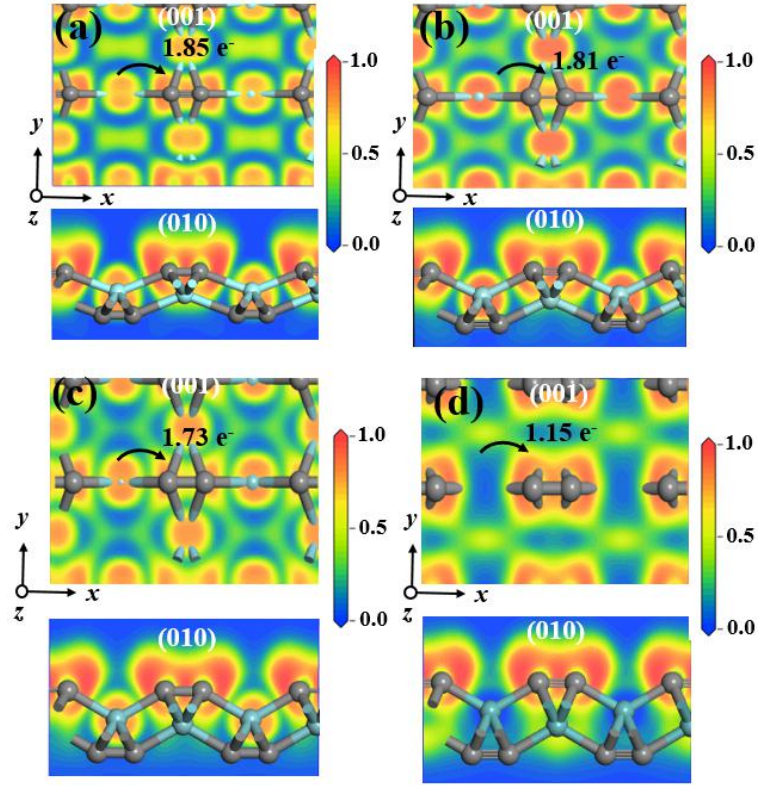

**Fig. S6** The electronic localization function (ELF) of the YC<sub>2</sub> (a), ZrC<sub>2</sub> (b), NbC<sub>2</sub> (c) and MoC<sub>2</sub> (d) monolayers. In the ELF maps, the red and blue colors refer to the highest value (1.00) and the lowest value (0.00) of ELF, respectively. Corresponding to the accumulation and depletion of electrons in the two colored regions.

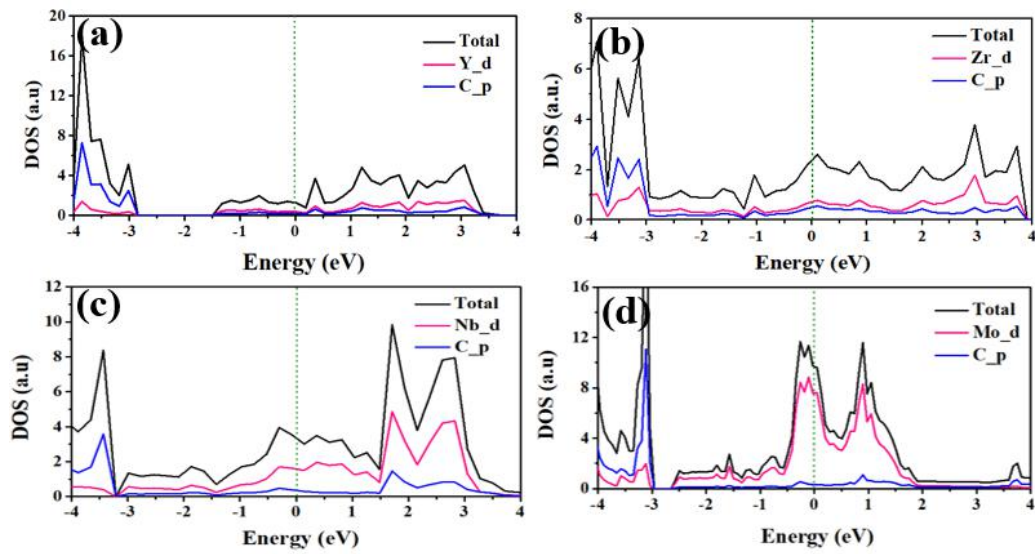

**Fig. S7** The partial density of states of the YC<sub>2</sub> (a), ZrC<sub>2</sub> (b), NbC<sub>2</sub> (c), and MoC<sub>2</sub> (d) monolayers. The Fermi energy is set to 0 eV as indicated by the vertical dashed line.

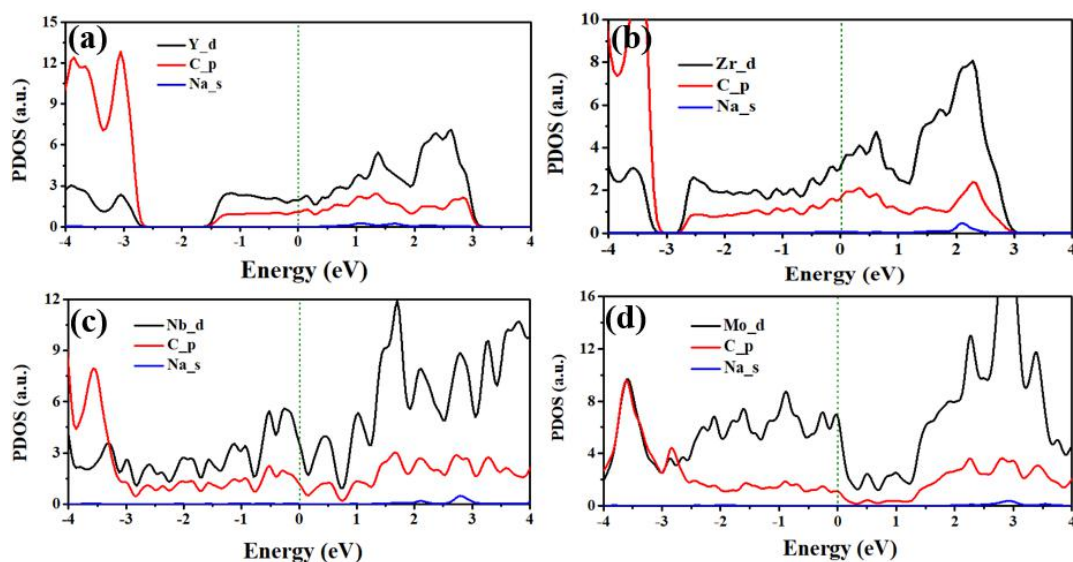

**Fig. S8** The partial density of states of Na-adsorbed YC<sub>2</sub> (a), ZrC<sub>2</sub> (b), NbC<sub>2</sub> (c), and MoC<sub>2</sub> (d) monolayers. The Fermi energy is set to 0 eV as indicated by the vertical dashed line.

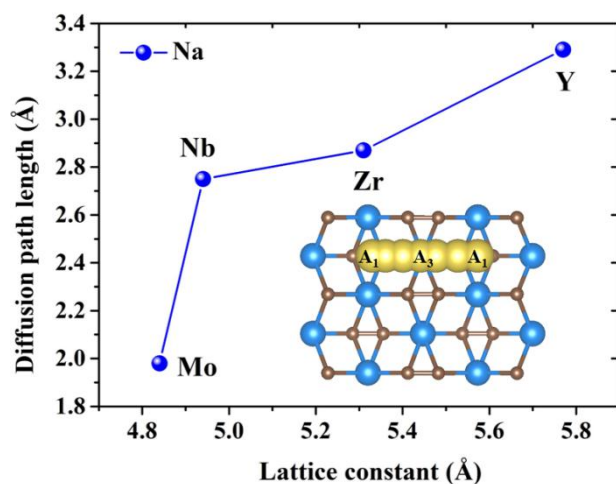

**Fig. S9** The variation of Path-I diffusion lengths of Na on the MC<sub>2</sub> (M = Y, Zr, Nb, and Mo) monolayers with the lattice constants of MC<sub>2</sub>.

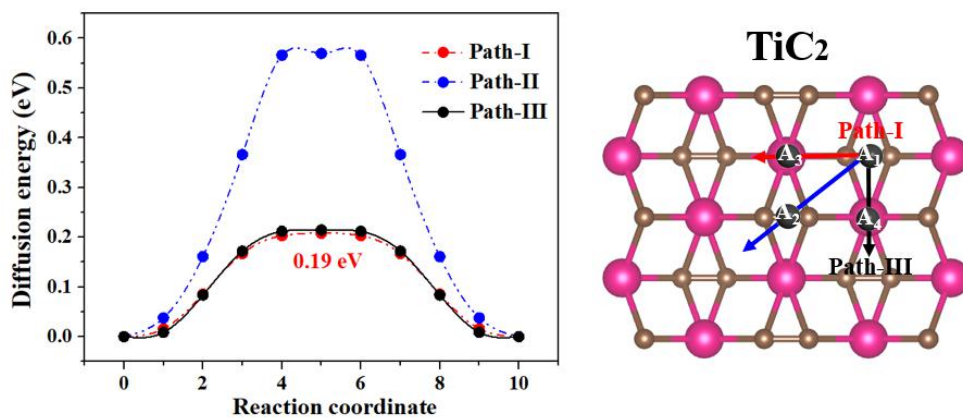

**Fig. S10** The energy profile (left) and diffusion pathways (right) of Na diffusing on the TiC<sub>2</sub> monolayer.

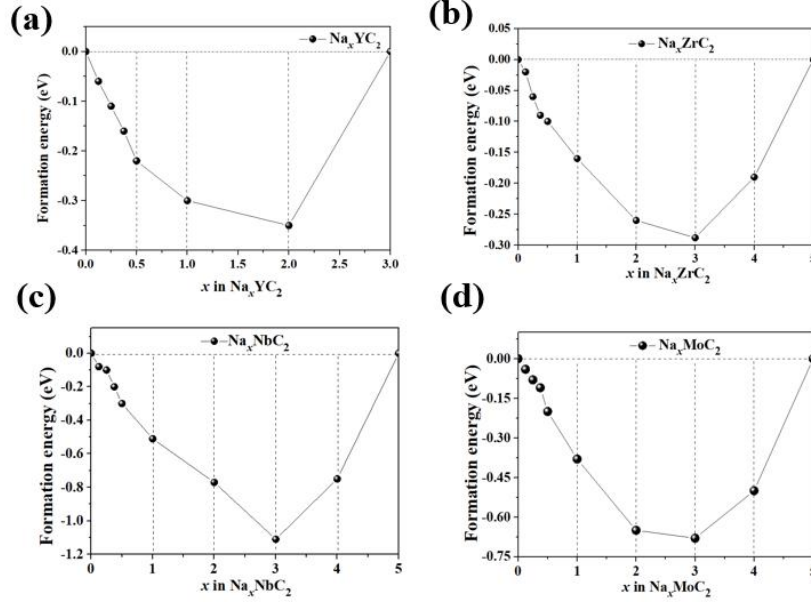

**Fig. S11** The formation energy ( $E_f$ ) of  $\text{Na}_x\text{YC}_2$  (a),  $\text{Na}_x\text{ZrC}_2$  (b),  $\text{Na}_x\text{NbC}_2$  (c), and  $\text{Na}_x\text{MoC}_2$  (d) with respect to  $\text{MC}_2$  monolayer and Na bulk *bcc* metal. Data points located on the convex hull represents the stable adsorption without decomposition.

Here, the most stable adsorptions configuration of different Na adsorption concentrations ( $x$ ) on the  $\text{MC}_2$  monolayer, we calculated the based on the following equation:<sup>S1</sup>

$$E_f(x) = (E_{\text{Na}_x\text{MC}_2} - E_{\text{MC}_2} - xE_{\text{Na-bulk}})/(x+1) \quad (1)$$

where  $E_{\text{MC}_2}$ ,  $E_{\text{Na}_x\text{MC}_2}$ , and  $E_{\text{Na-bulk}}$  are the energy of  $\text{MC}_2$  monolayer, the total energy of Na-adsorbed  $\text{MC}_2$ , and the energy per atom in the bulk Na, respectively. We plotted the convex energy hull, the cure of formation energies of all configurations considered vs. the concentrations of Na ( $x$ ) in the intercalated  $\text{MC}_2$  systems. Located on the hull with negative formation energies, and thus thermodynamically stable, these data further confirm the stability of  $\text{Na}_2\text{YC}_2$ ,  $\text{Na}_3\text{ZrC}_2$ ,  $\text{Na}_3\text{NbC}_2$ , and  $\text{Na}_3\text{MoC}_2$ .

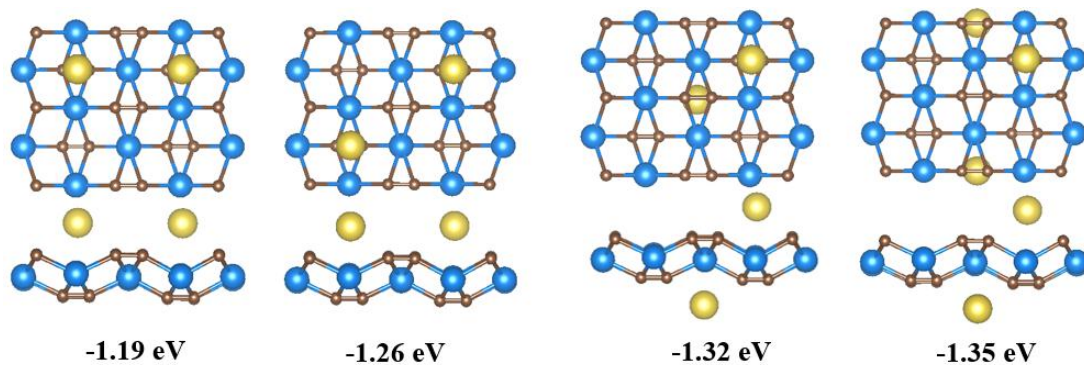

**Fig. S12** The optimized configurations and the corresponding average adsorption energies of Na for  $\text{Na}_{0.25}\text{NbC}_2$ .

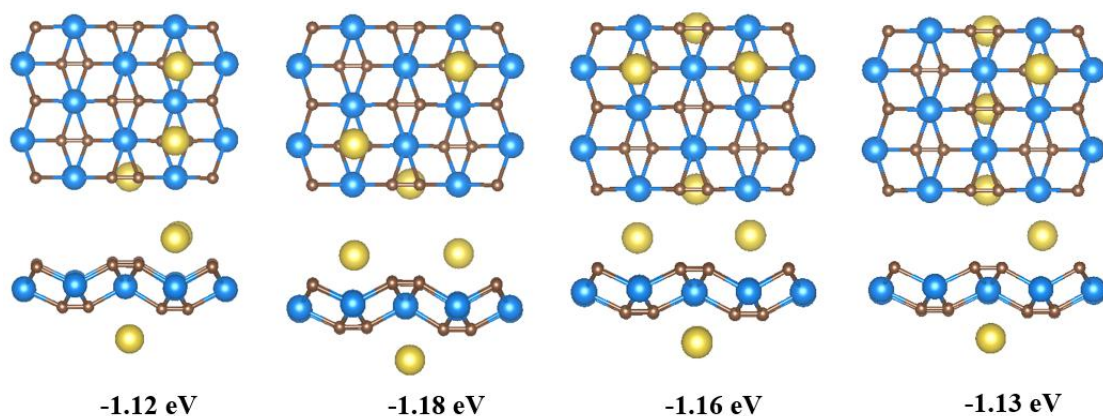

**Fig. S13** The optimized configurations and the corresponding average adsorption energies of Na for  $\text{Na}_{0.375}\text{NbC}_2$ .

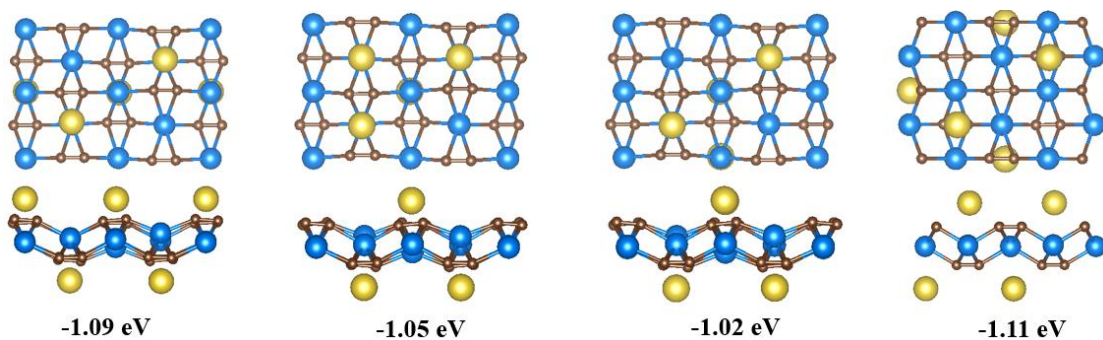

**Fig. S14** The optimized configurations and the corresponding average adsorption energies of Na for  $\text{Na}_{0.5}\text{NbC}_2$ .

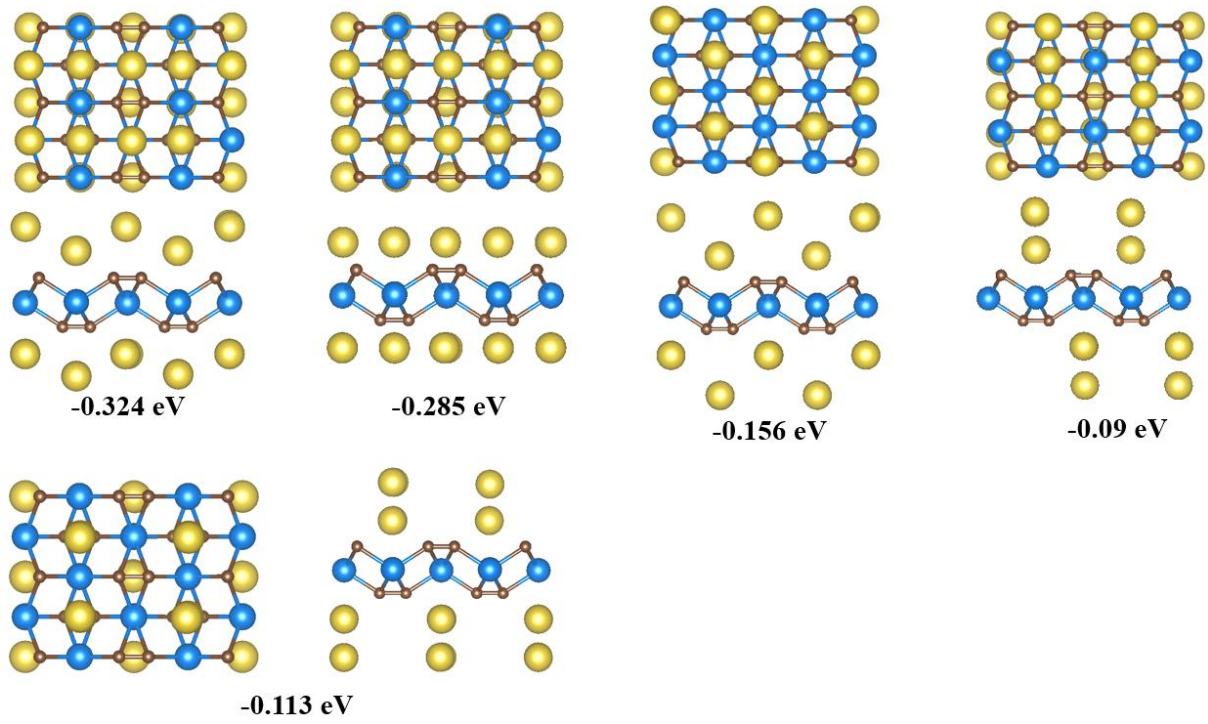

**Fig. S15** The optimized configurations and the average adsorption energies of Na for  $\text{Na}_2\text{NbC}_2$ : the additional 8 Na all adsorb at the  $A_3$  sites more far to the surface ( $E_{\text{ave}} = -0.324 \text{ eV}$ ), the additional 8 Na all adsorb at the  $A_3$  sites with the same height to the surface of the preadsorbed Na at  $A_1$  sites ( $E_{\text{ave}} = -0.285 \text{ eV}$ ), the additional 8 Na all adsorb at the  $A_3$  sites more far to the surface ( $E_{\text{ave}} = -0.324 \text{ eV}$ ), the additional 8 Na all adsorb at the  $A_1$  sites more far to the surface ( $E_{\text{ave}} = -0.156 \text{ eV}$ ), the additional 8 Na all adsorb at the  $A_4$  sites more far to the surface ( $E_{\text{ave}} = -0.009 \text{ eV}$ ), the additional 8 Na all adsorb at the  $A_2$  sites more far to the surface ( $E_{\text{ave}} = -0.113 \text{ eV}$ ).

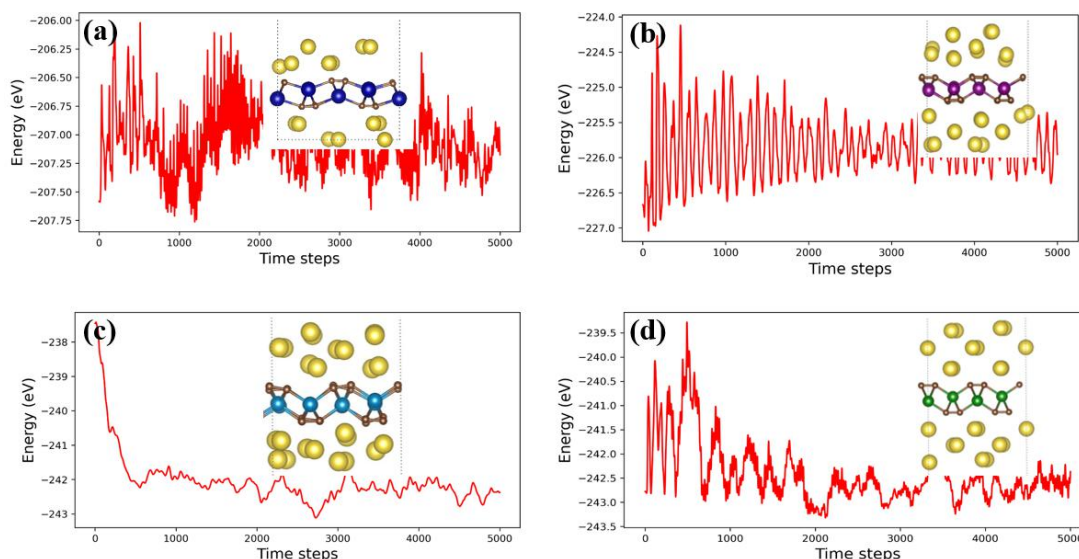

**Fig. S16** The end structures (side view) of the Na-intercalated MC<sub>2</sub> (M = Y, Zr, Nb, and Mo) monolayers through a 5 ps FPMD simulation at 300 K.

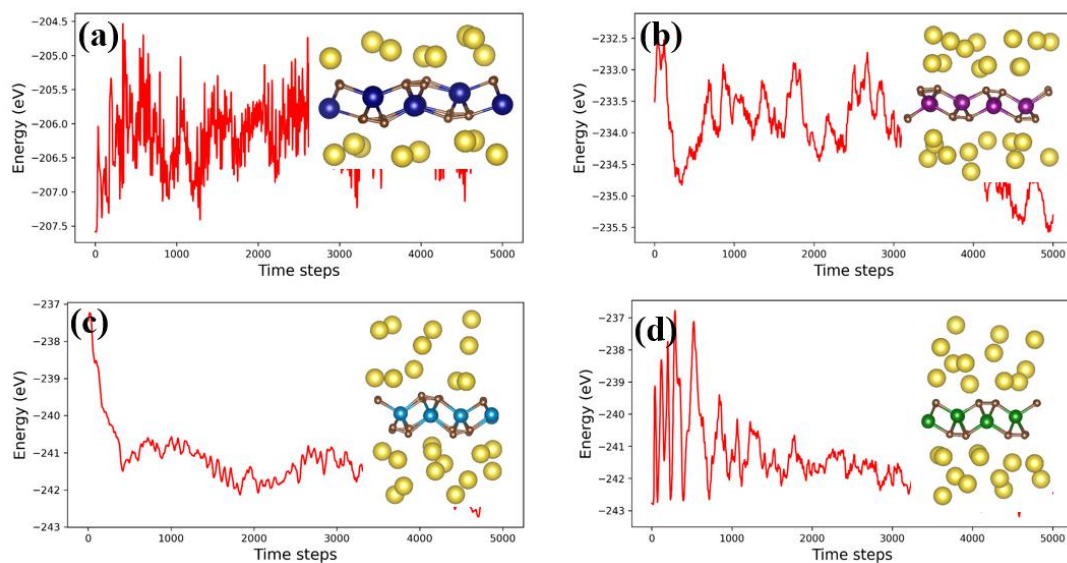

**Fig. S17** The end structures (side view) of the Na-intercalated MC<sub>2</sub> (M = Y, Zr, Nb, and Mo) monolayers through a 5 ps FPMD simulation at 500 K.

**Table S1.** The calculated lattice constant ( $a$ ,  $b$ , Å), lattice and volume change of MC<sub>2</sub> (M = Y, Zr, Nb, and Mo) nanosheets without and with adsorbed Na atoms.

|                                      | $a$ (Å) | $b$ (Å) | Lattice variation (%) |      | Volume variation (%) |
|--------------------------------------|---------|---------|-----------------------|------|----------------------|
| <b>YC<sub>2</sub></b>                | 11.60   | 8.56    |                       |      |                      |
| <b>Na<sub>2</sub>YC<sub>2</sub></b>  | 11.84   | 8.10    | 2.1                   | -5.3 | 9.8                  |
| <b>ZrC<sub>2</sub></b>               | 10.67   | 7.78    |                       |      |                      |
| <b>Na<sub>3</sub>ZrC<sub>2</sub></b> | 10.73   | 7.19    | 0.5                   | -7.5 | 0.8                  |
| <b>NbC<sub>2</sub></b>               | 9.95    | 7.10    |                       |      |                      |
| <b>Na<sub>3</sub>NbC<sub>2</sub></b> | 9.77    | 6.70    | -1.8                  | -5.6 | 6.9                  |
| <b>MoC<sub>2</sub></b>               | 9.68    | 6.02    |                       |      |                      |
| <b>Na<sub>3</sub>MoC<sub>2</sub></b> | 9.56    | 6.18    | -1.2                  | 2.6  | 6.05                 |

<sup>S1</sup> (a) T. Bo, P. F. Liu, J. Xu, J. R. Zhong, Y. B. Chen, O. Eriksson, F. W. Wang and B. T. Wang, *Phys. Chem. Chem. Phys.*, 2018, **20**, 22168–22178; (b) T. Bo, P. F. Liu, J. Xu, J. R. Zhong, F. W. Wang and B. T. Wang, *Phys. Chem. Chem. Phys.*, 2019, **21**, 5178–5188.
